# Supplementary material for: The functional roles of the three copper sites associated with the methionine-rich insert in the multicopper oxidase CueO fromE. coli
Source: Royal Society of Chemistry journal article supplement (doi:10.1039/c5mt00001g), 2015-01-01
Supplement: c5mt00001g1.pdf [file c5mt00001g1.pdf]

**The Functional Roles of The Three Copper Sites Associated with The  
Methionine-Rich Insert in the Multicopper Oxidase CueO from *E. coli***

Laura Cortes, Anthony G. Wedd and Zhiguang Xiao\*

School of Chemistry and Bio21 Molecular Science and Biotechnology Institute,  
University of Melbourne, Parkville, Victoria 3010, Australia

Email: [z.xiao@unmelb.edu.au](mailto:z.xiao@unmelb.edu.au)

Tel: +61 3 9035 6072

Fax: +61 3 9347 5180

**Electronic Supplementary Data**

**Table S1.** Primer sequences for variant forms of CueO <sup>a</sup>

| Variant | Site variation        | Primer sequence (5'- 3') |                                                                                                                                                     |
|---------|-----------------------|--------------------------|-----------------------------------------------------------------------------------------------------------------------------------------------------|
| Cu5-m1  | D360M                 | F                        | CAACTCTCTATGGACCCGATGCTC <b><u>ATG</u></b> ATG<br>ATGGGGATGCAGATGCTAATG                                                                             |
|         |                       | R                        | CAT <b><u>CAT</u></b> GAGCATCGGGTCCATAGAGAGTTG                                                                                                      |
| Cu5-m2  | M355L,D360N           | F                        | GTACGCAAGCTGCAACTCTCT <b><u>CTG</u></b> GACCCG<br>ATGCTC <b><u>AAT</u></b> ATGATGGGGATGCAGATGCTA<br>ATG                                             |
|         |                       | R                        | GAGCATCGGGTC <b><u>CAG</u></b> AGAGAGTTGCAGCT<br>TGCGTAC                                                                                            |
| Cu6-m   | M358,362S             | F                        | CAACTCTCTATGGACCCG <b><u>AGT</u></b> CTCGATATG<br><b><u>AGT</u></b> GGGATGCAGATGCTAATGGAGAAA                                                        |
|         |                       | R                        | ATCGAG <b><u>ACT</u></b> CGGGTCCATAGAGAGTTG                                                                                                         |
| Cu7-m   | M364,368S             | F                        | CAACTCTCTATGGACCCGATGCTCGATATG<br>ATGGGG <b><u>AGT</u></b> CAGATGCTA <b><u>AGT</u></b> GAGAAATA<br>TGGCGATCAGGCGATG                                 |
|         |                       | R                        | CCC CAT CAT ATC GAG CAT CGG GTC                                                                                                                     |
| Cu6,7-m | M358,362,<br>364,368S | F                        | CAACTCTCTATGGACCCG <b><u>AGT</u></b> CTCGATATG<br><b><u>AGT</u></b> GGG <b><u>TCG</u></b> CAGATGCTAT <b><u>TCG</u></b> GAGAAATA<br>TGGCGATCAGGCGATG |
|         |                       | R                        | ATCGAG <b><u>ACT</u></b> CGGGTCCATAGAGAGTTG                                                                                                         |

<sup>a</sup> Forward and reverse primers are indicated by the letters F and R, respectively. Sequences corresponding to site-specific mutations are in bold-face and underlined.

**Table S2.** Mass Spectrometry Data for isolated *apo*-CueO and its variants

| Protein | Site Variations   | Molar Mass (Da) |          |
|---------|-------------------|-----------------|----------|
|         |                   | Calced          | Found    |
| wt-CueO | –                 | 53420.40        | 53418.27 |
| Cu5-m1  | D360M             | 53436.50        | 53436.48 |
| Cu5-m2  | M355L,D360N       | 53401.39        | 53401.99 |
| Cu6-m   | M358,362S         | 53332.18        | 53331.57 |
| Cu7-m   | M364,368S         | 53332.18        | 53332.78 |
| Cu6,7-m | M355,362,364,368S | 53243.96        | 53243.78 |

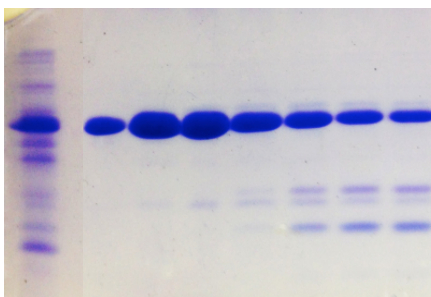

**Fig. S1** Representative SDS-PAGE gel of NaCl-gradient elution fractions from an anion-exchange DE-52 column in Tris-HCl buffer (20 mM, pH 8.5). wt-CueO protein and its variants were expressed in *E. coli* BL21(DE3) Codon-Plus(+) cells (see experimental section).

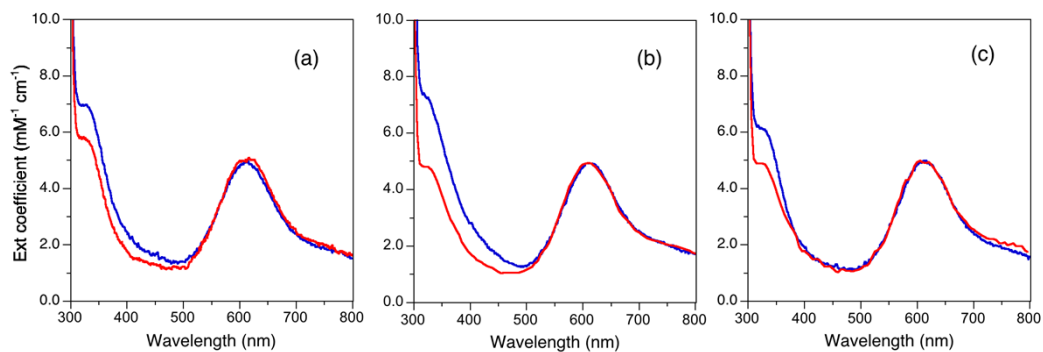

**Fig. S2** Representative solution spectra of Cu-activated CueO samples isolated in Mops buffer (20 mM, pH 7.0; shown in blue) and then after buffer-change to BisTris buffer (20 mM, pH 7.0; shown in red): (a) wt-CueO; (b) Cu5-m2; (c) Cu6,7-m.

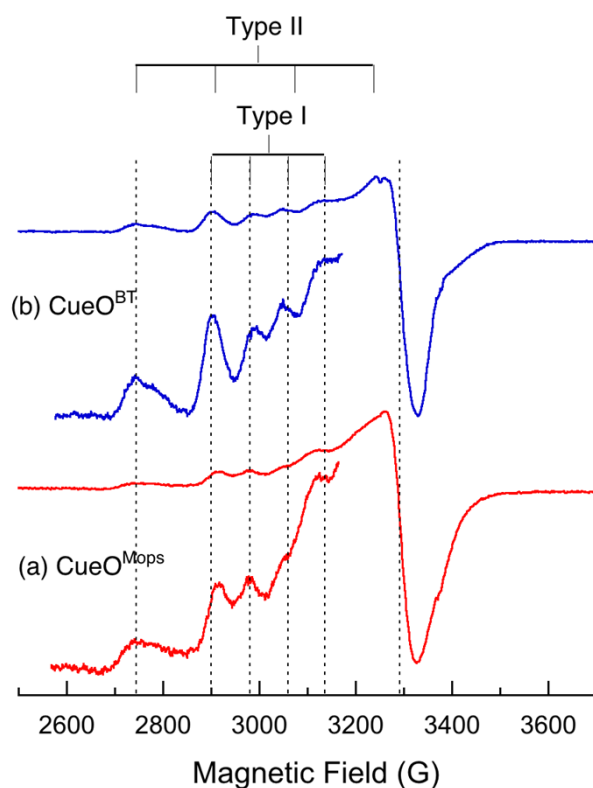

**Fig. S3** EPR spectra of Cu-activated wt-CueO enzyme ( $\sim 100 \mu\text{M}$ ): (a) as isolated form in Mops buffer (50 mM, pH 7.0) designated as CueO<sup>Mops</sup>; (b) after buffer-change to BisTris (50 mM, pH 7.0) designated as CueO<sup>BT</sup>.  $\sim 10\%$  glycerol was included in the buffer. EPR recording conditions: microwave frequency 9.461 GHz, microwave power 0.63 mW, modulation frequency 100 kHz; modulation amplitude 4 G, sweep time 50 s, time constant 20 ms, average number of scan 10.

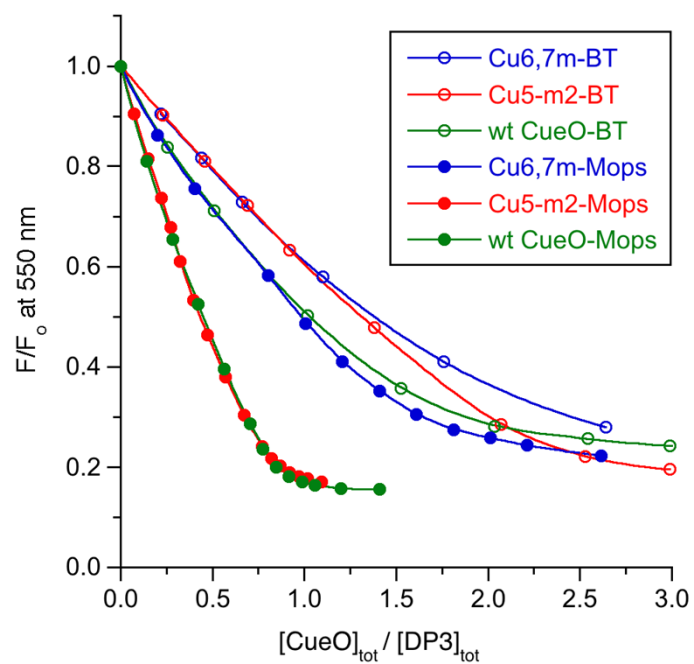

**Fig. S4** Change in fluorescence intensity (expressed as  $F/F_0$  at 550 nm) of Cu(II) probe DP3 (2.0  $\mu$ M) in Mops buffer (50 mM, pH 7.4) upon titration with variant forms of Cu-activated CueO proteins (expressed as  $[CueO]_{tot}/[DP3]_{tot}$ ). see inset for each titration curve label

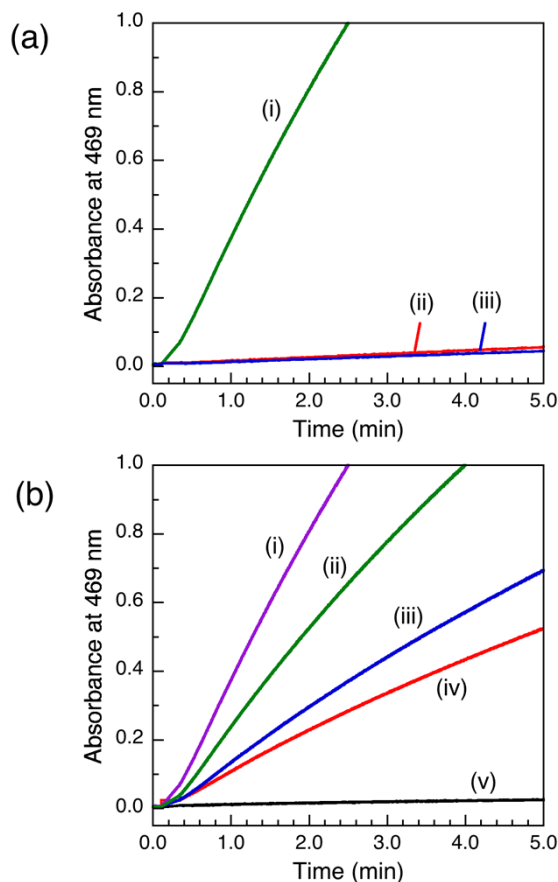

**Fig. S5** Phenol oxidase activity of wt-CueO on model substrate DMP (5.0 mM) in air-saturated buffers (50 mM, pH 7.0):

- (a) Buffer effect demonstrating a requirement for loosely bound copper for DMP oxidation: (i) reaction with wt-CueO (0.05  $\mu$ M) in MOPS buffer; (ii) same reaction as (i) but with addition of 5.0 mM BisTris buffer (pH 7.0) into the MOPS buffer; (iii) same reaction as (i) but with the wt-CueO pre-treated with 20 mM BisTris buffer (pH 7.0) for 10 min and then buffer-changed back to MOPS only, by a desalting column, for the reaction.
- (b) Reaction in MOPS buffer with different concentrations of wt-CueO at 0.05  $\mu$ M (i), 0.04  $\mu$ M (ii), 0.025  $\mu$ M (iii), 0.02  $\mu$ M (iv) and control without the enzyme (v). A plot of the reaction rates versus CueO concentrations is shown in Figure 2b(i).
